# Supplementary material for: Ultrafast charge separation in a WC@C/CdS heterojunction enables efficient visible-light-driven hydrogen generation
Source: Royal Society of Chemistry journal article supplement (doi:10.1039/d2dt03129a), 2022-12-05
Supplement: d2dt03129a1.pdf [file d2dt03129a1.pdf]

# Ultrafast charge separation in WC@C/CdS heterojunction enables efficient visible-light-driven hydrogen generation

Lu Chen<sup>a\*</sup>, Feng Chen<sup>a</sup>, Shaoming Ying<sup>a</sup>, Ruowen Liang<sup>a</sup>, Guiyang Yan<sup>a</sup>, Xuxu  
Wang<sup>b\*</sup>, Yuzhou Xia<sup>a\*</sup>

<sup>a</sup>Department of Chemistry, Fujian Province University Key Laboratory of Green Energy and  
Environment Catalysis, Ningde Normal University, Ningde 352100, PR China

<sup>b</sup>State Key Laboratory of Photocatalysis on Energy and Environment, Fuzhou University, Fuzhou  
350002, PR China

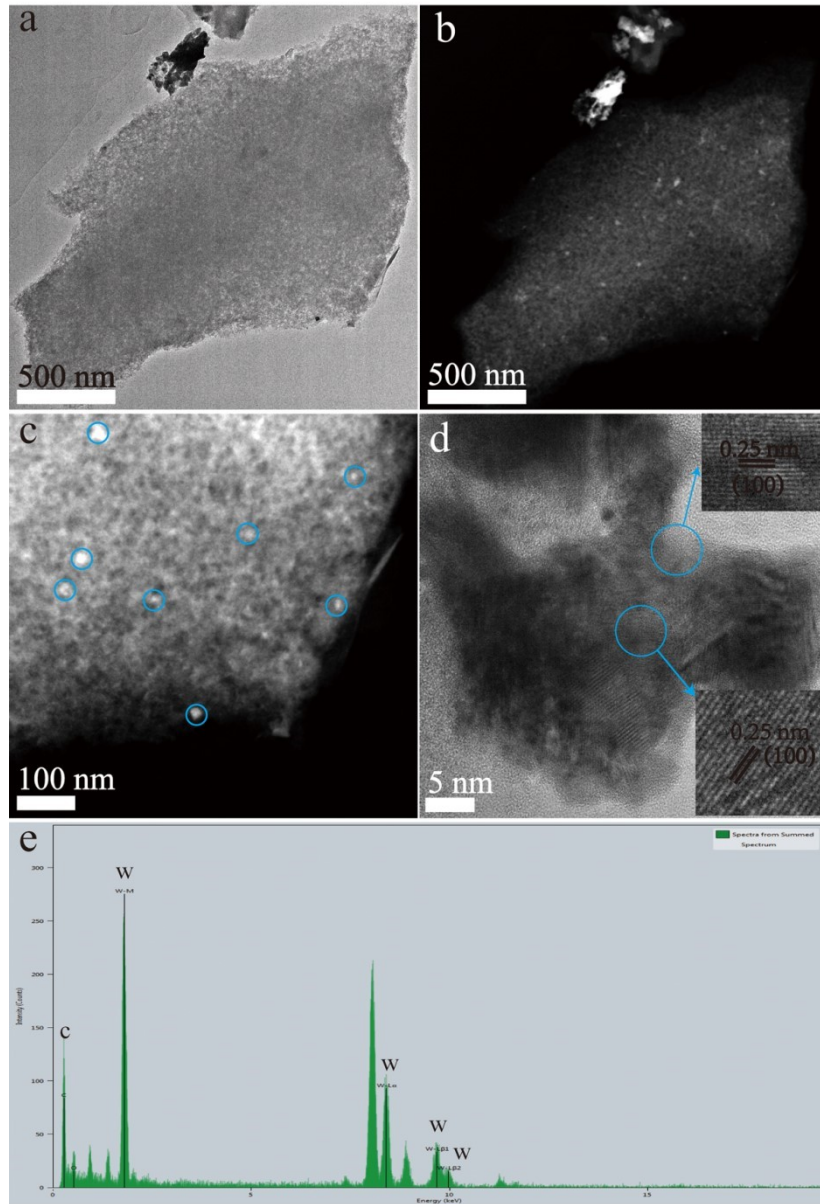

Fig. S1 (a-d) TEM、STEM and HRTEM images of WC@C, (e) EDX image of WC@C sample

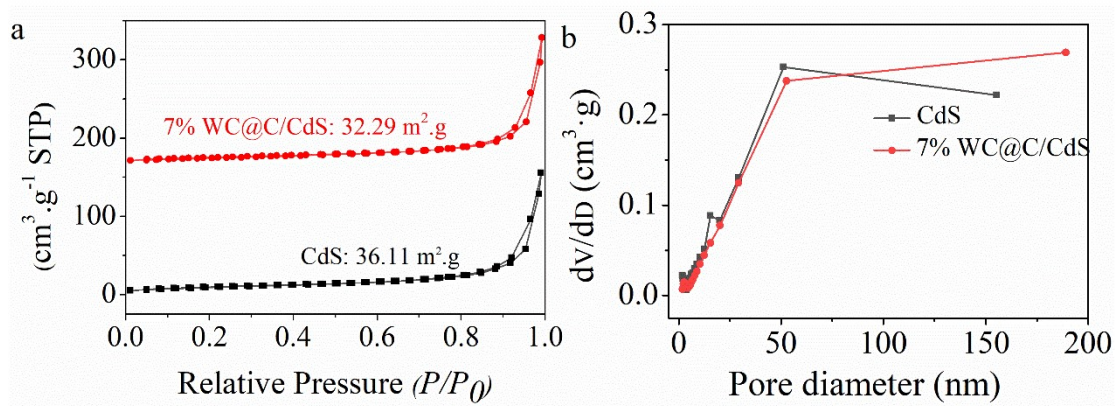

Fig. S2 (a)  $N_2$  adsorption–desorption isotherms, (b) pore size distribution of the CdS and WC@C (7 wt%)/CdS samples.

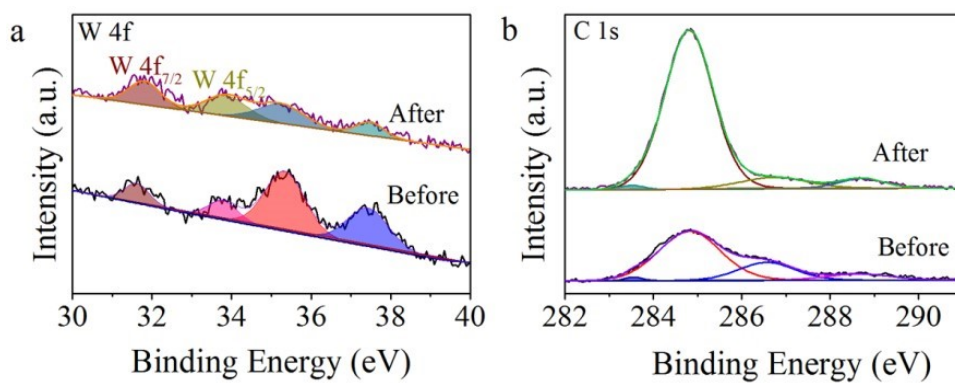

Fig. S3 XPS spectra of (a) W 4f and (b) C 1s of WC@C (7 wt%)/CdS before and after photocatalytic reaction
